## Expression of Concern

# Expression of Concern: Long non-coding RNA linc-ITGB1 promotes cell proliferation, migration and invasion in human hepatoma carcinoma by upregulating ROCK1

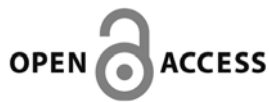

The Editorial Office has been made aware of potential issues surrounding the scientific validity of this paper, hence has issued an expression of concern to notify readers whilst the Editorial Office investigates.

Version of Record published:  
19 April 2021
